# Supplementary material for: Sexual Dimorphism in Energy Metabolism of Wistar Rats Using Data Analysis
Source: PubMed Central journal article supplement (PMC7287681; doi:10.3390/molecules25102353), 2020-05-18
Supplement: molecules-25-02353-s001.pdf [file molecules-25-02353-s001.pdf]

Article

# Sexual Dimorphism in Energy Metabolism of Wistar Rats Using Data Analysis

Andrea Leskanicova <sup>1</sup>, Olga Chovancova <sup>2</sup>, Marian Babincak <sup>1</sup>, Ludmila Verboova <sup>3</sup>, Zuzana Benetinova <sup>3</sup>, Denisa Macekova <sup>2</sup>, Jozef Kostolny <sup>2</sup>, Benadik Smajda <sup>1,\*</sup> and Terezia Kiskova <sup>1,\*</sup>

<sup>1</sup> Institute of Biology and Ecology, Faculty of Sciences, University of Pavol Jozef Šafárik in Košice, Šrobárova 2, 041 80 Košice, Slovak Republic; andrea.stafurikova@student.upjs.sk (A.L.); marian.babincak@student.upjs.sk (M.B.)

<sup>2</sup> Department of Informatics, Faculty of Management Sciences and Informatics, University of Žilina, Univerzitná 8215/1, 010 26 Žilina, Slovak Republic; olga.chovancova@fri.uniza.sk (O.C.); denisa.macekova@fri.uniza.sk (D.M.); jozef.kostolny@fri.uniza.sk (J.K.)

<sup>3</sup> Department of Pathology, Faculty of Medicine, University of Pavol Jozef Šafárik in Košice, Rastislavova 43, 040 01 Košice, Slovak Republic; ludmila.verboova@upjs.sk (L.V.); zuzana.benetinova@upjs.sk (Z.B.)

\* Correspondence: benadik.smajda@upjs.sk (B.S.); terezia.kiskova@upjs.sk (T.K.); Tel.: +421-55-234-1216 (T.K.); Fax: +421-55-622-2124 (T.K.)

**Table 1.** Values of metabolites analyzed in the experiment.

| Metabolite (μM) | Female                 | Male                |
|-----------------|------------------------|---------------------|
| C0              | 17.69 ± 2.431 ***      | 29.86 ± 4.475       |
| C2              | 11.37 ± 1.894 *        | 13.01 ± 1.828       |
| C3              | 0.5836 ± 0.1106 ***    | 01.159 ± 0.2450     |
| C3-DC (C4-OH)   | 0.06929 ± 0.01176 **   | 0.08489 ± 0.01522   |
| C3-OH           | 0.008514 ± 0.001295 *  | 0.01006 ± 0.0009112 |
| C3:1            | 0.009329 ± 0.002053    | 0.0102 ± 0.001154   |
| C4              | 0.3979 ± 0.05378 ***   | 0.5263 ± 0.09839    |
| C4:1            | 0.01487 ± 0.002644     | 0.01526 ± 0.001764  |
| C5              | 0.1598 ± 0.02957 ***   | 0.2480 ± 0.04029    |
| C5-DC (C6-OH)   | 0.01073 ± 0.0008730 *  | 0.01193 ± 0.001342  |
| C5-M-DC         | 0.02451 ± 0.003700     | 0.02377 ± 0.001730  |
| C5-OH (C3-DC-M) | 0.03326 ± 0.005317 *** | 0.04561 ± 0.004371  |
| C5:1            | 0.02036 ± 0.001833     | 0.02173 ± 0.002696  |
| C5:1-DC         | 0.009457 ± 0.0009395   | 0.009043 ± 0.001102 |
| C6 (C4:1-DC)    | 0.05706 ± 0.006587 *** | 0.07064 ± 0.005369  |
| C6:1            | 0.02036 ± 0.002069 **  | 0.02313 ± 0.002057  |
| C7-DC           | 0.008143 ± 0.0008751   | 0.009357 ± 0.001504 |
| C8              | 0.06494 ± 0.01176 *    | 0.07001 ± 0.007655  |
| C9              | 0.01111 ± 0.0005960    | 0.01206 ± 0.001775  |
| C10             | 0.03496 ± 0.004365     | 0.03653 ± 0.003538  |
| C10:1           | 0.05257 ± 0.005530     | 0.05304 ± 0.01013   |
| C10:2           | 0.01919 ± 0.001176 *** | 0.02229 ± 0.001755  |
| C12             | 0.03193 ± 0.002690     | 0.03333 ± 0.003771  |
| C12-DC          | 0.04391 ± 0.001279     | 0.04431 ± 0.002102  |
| C12:1           | 0.05577 ± 0.006487     | 0.04981 ± 0.01018   |
| C14             | 0.04501 ± 0.006896     | 0.03999 ± 0.004532  |
| C14:1           | 0.05233 ± 0.005825     | 0.04761 ± 0.006719  |

|            |                              |                      |
|------------|------------------------------|----------------------|
| C14:1-OH   | 0.009529 ± 0.001705          | 0.008771 ± 0.0009903 |
| C14:2      | 0.008757 ± 0.001468          | 0.008486 ± 0.0005586 |
| C14:2-OH   | 0.007471 ± 0.0008241         | 0.0068 ± 0.001088    |
| C16        | <b>0.09847 ± 0.01814 *</b>   | 0.08574 ± 0.01240    |
| C16-OH     | <b>0.0072 ± 0.0009735 *</b>  | 0.006357 ± 0.0008644 |
| C16:1      | <b>0.03349 ± 0.003485 **</b> | 0.02961 ± 0.002455   |
| C16:1-OH   | <b>0.01149 ± 0.001318 *</b>  | 0.01003 ± 0.001961   |
| C16:2      | 0.005786 ± 0.0009404         | 0.005657 ± 0.0006321 |
| C16:2-OH   | 0.01043 ± 0.001390           | 0.01026 ± 0.001503   |
| C18        | <b>0.07547 ± 0.01215 ***</b> | 0.05616 ± 0.007502   |
| C18:1      | 0.1095 ± 0.02569             | 0.09933 ± 0.01318    |
| C18:1-OH   | <b>0.01391 ± 0.002164 *</b>  | 0.0121 ± 0.001870    |
| C18:2      | 0.02187 ± 0.004628           | 0.02231 ± 0.003252   |
| <hr/>      |                              |                      |
| Ala        | 465.7 ± 71.47                | 421.1 ± 82.94        |
| Arg        | 157.7 ± 19.25                | 156.4 ± 26.00        |
| Asn        | 28.47 ± 3.061                | 30.80 ± 5.535        |
| Asp        | <b>12.83 ± 2.478 *</b>       | 15.94 ± 4.050        |
| Cit        | 73.44 ± 7.500                | 69.59 ± 10.53        |
| Gln        | <b>667.4 ± 81.54 **</b>      | 561.6 ± 122.3        |
| Glu        | 81.64 ± 15.76                | 87.64 ± 11.56        |
| Gly        | <b>519.0 ± 61.26 ***</b>     | 728.9 ± 111.2        |
| His        | 53.63 ± 4.078                | 60.76 ± 9.361        |
| Ile        | 64.37 ± 8.848                | 66.70 ± 10.50        |
| Leu        | 107.0 ± 12.22                | 117.2 ± 18.41        |
| Lys        | 481.4 ± 50.77                | 448.1 ± 89.71        |
| Met        | <b>43.34 ± 4.708 *</b>       | 49.86 ± 6.507        |
| Orn        | <b>42.39 ± 5.499 **</b>      | 63.20 ± 15.23        |
| Phe        | <b>45.04 ± 5.490 *</b>       | 52.04 ± 5.503        |
| Pro        | <b>175.7 ± 20.04 ***</b>     | 228.7 ± 41.23        |
| Ser        | 337.3 ± 35.36                | 358.9 ± 48.96        |
| Thr        | 230.4 ± 29.50                | 198.4 ± 50.15        |
| Trp        | <b>80.53 ± 13.92 **</b>      | 61.67 ± 14.09        |
| Tyr        | <b>50.24 ± 11.59 ***</b>     | 72.66 ± 8.965        |
| Val        | <b>124.3 ± 16.32 *</b>       | 142.4 ± 22.21        |
| <hr/>      |                              |                      |
| Ac-Orn     | 0.02914 ± 0.04828            | 0.05171 ± 0.06201    |
| ADMA       | 0.5843 ± 0.07151             | 0.5789 ± 0.07936     |
| alpha-AAA  | 0.9631 ± 0.2185              | 1.067 ± 0.1510       |
| c4-OH-Pro  | <b>0.1077 ± 0.07170 *</b>    | 0.1477 ± 0.06590     |
| Carnosine  | 0.1889 ± 0.06601             | 0.1854 ± 0.1144      |
| Creatinine | 17.11 ± 1.754                | 15.94 ± 1.803        |
| DOPA       | 0.04057 ± 0.01726            | 0.04814 ± 0.002742   |
| Dopamine   | 0.1006 ± 0.006223            | 0.07414 ± 0.04883    |
| Histamine  | 0.6670 ± 0.1389              | 0.5460 ± 0.1507      |
| Kynurenine | <b>2.363 ± 0.4258 **</b>     | 2.736 ± 0.2339       |
| Met-SO     | <b>3.820 ± 0.4884 **</b>     | 5.391 ± 1.364        |
| Putrescine | 0.5493 ± 0.09430             | 0.5763 ± 0.1630      |
| Sarcosine  | <b>5.500 ± 0.9958 ***</b>    | 8.637 ± 1.281        |
| SDMA       | <b>0.2100 ± 0.03215 **</b>   | 0.1729 ± 0.01706     |
| Serotonin  | 0.04986 ± 0.03872            | 0.04929 ± 0.03820    |
| Spermidine | <b>2.159 ± 0.3407 ***</b>    | 3.021 ± 0.5259       |

|                  |                            |                 |
|------------------|----------------------------|-----------------|
| <b>Spermine</b>  | <b>0.4237 ± 0.05173 **</b> | 0.5463 ± 0.1290 |
| <b>t4-OH-Pro</b> | <b>78.29 ± 9.469 **</b>    | 101.7 ± 21.77   |
| <b>Taurine</b>   | <b>177.1 ± 34.34 **</b>    | 127.6 ± 39.33   |

Data are expressed as mean ± SD. Significance versus male is by \*P < 0.05; \*\*P < 0.01 and \*\*\*P < 0.001, respectively.

**Table 2.** Abbreviations of metabolites analyzed.

| <b>BC code</b>         | <b>Analyte</b>              |
|------------------------|-----------------------------|
| <b>Amino acids</b>     |                             |
| Ala                    | Alanine                     |
| Arg                    | Arginine                    |
| Asn                    | Asparagine                  |
| Asp                    | Aspartate                   |
| Cit                    | Citrulline                  |
| Gln                    | Glutamine                   |
| Glu                    | Glutamate                   |
| Gly                    | Glycine                     |
| His                    | Histidine                   |
| Ile                    | Isoleucine                  |
| Leu                    | Leucine                     |
| Lys                    | Lysine                      |
| Met                    | Methionine                  |
| Orn                    | Ornithine                   |
| Phe                    | Phenylalanine               |
| Pro                    | Proline                     |
| Ser                    | Serine                      |
| Thr                    | Threonine                   |
| Trp                    | Tryptophan                  |
| Tyr                    | Tyrosine                    |
| Val                    | Valine                      |
| <b>Biogenic Amines</b> |                             |
| Ac-Orn                 | Acetylmornithine            |
| ADMA                   | Asymmetric dimethylarginine |
| SDMA                   | Symmetric dimethylarginine  |
| alpha-AAA              | alpha-Aminoadipic acid      |
| Histamine              | Histamine                   |
| Met-SO                 | Methionine-Sulfoxide        |
| Kyn                    | Kynurenine                  |
| Putrescine             | Putrescine                  |
| Sarcosine              | Sarcosine                   |
| Spermidine             | Spermidine                  |
| Spermine               | Spermine                    |
| Serotonin              | Serotonin                   |
| PEA                    | Phenylethylamine            |
| Nitro-Tyr              | Nitrotyrosine               |
| c4-OH-Pro              | cis-4-Hydroxyproline        |
| t4-OH-Pro              | trans-4-Hydroxyproline      |
| Creatinine             | Creatinine                  |
| Carnosine              | Carnosine                   |
| Taurine                | Taurine                     |
| DOPA                   | Dihydroxyphenylalanine      |

| Dopamin              | Dopamin                                                                                                   |
|----------------------|-----------------------------------------------------------------------------------------------------------|
| <b>Acylcarnitine</b> |                                                                                                           |
| C0                   | Carnitine (free)                                                                                          |
| C2                   | Acetylcarnitine                                                                                           |
| C3                   | Propionylcarnitine                                                                                        |
| C3:1                 | Propenoylcarnitine                                                                                        |
| C3-OH                | Hydroxypropionylcarnitine                                                                                 |
| C4                   | Butyrylcarnitine / Isobutyrylcarnitine                                                                    |
| C4:1                 | Butenoylcarnitine                                                                                         |
| C4-OH (C3-DC)        | Hydroxybutyrylcarnitine (Malonylcarnitine)                                                                |
| C5                   | Isovalerylcarnitine / 2-Methylbutyrylcarnitine / Valerylcarnitine                                         |
| C5:1                 | Tiglylcarnitine / 3-Methyl-crotonylcarnitine                                                              |
| C5:1-DC              | Glutaconylcarnitine / Mesaconylcarnitine                                                                  |
| C5-DC (C6-OH)        | Glutarylacarnitine (Hydroxyhexanoylcarnitine [= Hydroxycaproylcarnitine])                                 |
| C5-M-DC              | Methylglutarylacarnitine                                                                                  |
| C5-OH (C3-DC-M)      | Hydroxyisovalerylcarnitine / Hydroxy-2-methylbutyryl<br>/Hydroxyvalerylcarnitine (Methylmalonylcarnitine) |
| C6 (C4:1-DC)         | Hexanoylcarnitine [= Caproylcarnitine] (Fumarylacarnitine)                                                |
| C6:1                 | Hexenoylcarnitine                                                                                         |
| C7-DC                | Pimelylcarnitine                                                                                          |
| C8                   | Octanoylcarnitine [= Caprylylcarnitine]                                                                   |
| C9                   | Nonanoylcarnitine [= Pelargonylcarnitine]                                                                 |
| C10                  | Decanoylcarnitine [= Caprylcarnitine]                                                                     |
| C10:1                | Decenoylcarnitine                                                                                         |
| C10:2                | Decadienoylcarnitine                                                                                      |
| C12                  | Dodecanoylcarnitine [= Laurylcarnitine]                                                                   |
| C12:1                | Dodecenoylcarnitine                                                                                       |
| C12-DC               | Dodecanedioylcarnitine                                                                                    |
| C14                  | Tetradecanoylcarnitine [= Myristylcarnitine]                                                              |
| C14:1                | Tetradecenoylcarnitine [= Myristoleylcarnitine]                                                           |
| C14:1-OH             | Hydroxytetradecenoylcarnitine [= Hydroxymyristoleylcarnitine]                                             |
| C14:2                | Tetradecadienoylcarnitine                                                                                 |
| C14:2-OH             | Hydroxytetradecadienoylcarnitine                                                                          |
| C16                  | Hexadecanoylcarnitine [= Palmitoylcarnitine]                                                              |
| C16:1                | Hexadecenoylcarnitine [= Palmitoleylcarnitine]                                                            |
| C16:1-OH             | Hydroxyhexadecenoylcarnitine [= Hydroxypalmitoleylcarnitine]                                              |
| C16:2                | Hexadecadienoylcarnitine                                                                                  |
| C16:2-OH             | Hydroxyhexadecadienoylcarnitine                                                                           |
| C16-OH               | Hydroxyhexadecanoylcarnitine [= Hydroxypalmitoylcarnitine]                                                |
| C18                  | Octadecanoylcarnitine [= Stearylacarnitine]                                                               |
| C18:1                | Octadecenoylcarnitine [= Oleylcarnitine]                                                                  |
| C18:1-OH             | Hydroxyoctadecenoylcarnitine [= Hydroxyoleylcarnitine]                                                    |
| C18:2                | Octadecadienoylcarnitine [= Linoleylcarnitine]                                                            |
